# Supplementary material for: Association between dietary intake and risk of Parkinson’s disease: cross-sectional analysis of survey data from NHANES 2007–2016
Source: Front Nutr. 2023 Dec 15;10:1278128. doi: 10.3389/fnut.2023.1278128 (PMC10773772; doi:10.3389/fnut.2023.1278128)
Supplement: Supplementary file 6 [file Table_4.xlsx]

## Sheet: Sheet1
Variable	Before PSM				After PSM
	Unadjusted OR (95% CI)	p	Adjusted OR (95% CI)*	p	Unadjusted OR (95% CI)	p	Adjusted OR (95% CI)*	p
dietary intakes from food
Vitamin C, mg/d
age<60	0.999(0.994,1.005)	0.779	0.999(0.994,1.005)	0.782	1.000(0.992,1.007)	0.911	0.999(0.992,1.006)	0.828
age>60	1.001(0.999,1.002)	0.556	0.999(0.998,1.002)	0.976	0.999(0.993,1.005)	0.788	0.995(0.987,1.002)	0.159
male	1.001(0.997,1.004)	0.713	1.000(0.997,1.003)	0.825	1.001(0.994,1.008)	0.844	1.001(0.994,1.007)	0.826
female	0.997(0.992,1.003)	0.373	0.997(0.991,1.003)	0.302	0.997(0.989,1.006)	0.523	0.994(0.985,1.004)	0.245
Vitamin K, μg/d
age<60	1.001(0.999,1.002)	0.322	1.001(0.999,1.002)	0.221	1.001(0.998,1.004)	0.653	1.001(0.998,1.004)	0.446
age>60	0.999(0.0.997,1.001)	0.298	0.998(0.995,1.001)	0.124	0.998(0.995,1.002)	0.339	0.995(0.990,1.001)	0.085
male	1.000(1.000,1.000)	0.988	1.000(0.999,1.001)	0.837	1.000(0.996,1.003)	0.865	1.000(0.997,1.003)	0.931
female	1.000(0.998,1.003)	0.656	1.000(0.998,1.003)	0.712	1.001(0.996,1.006)	0.665	1.001(0.997,1.004)	0.732
Iron, mg/d
age<60	1.051(1.014,1.090)	0.007	1.052(1.017,1.088)	0.004	1.036(1.004,1.070)	0.029	1.044(1.008,1.082)	0.015
age>60	0.976(0.924,1.030)	0.375	0.971(0.917,1.028)	0.314	0.957(0.894,1.025)	0.207	0.947(0.878,1.022)	0.164
male	1.051(1.014,1.088)	0.006	1.049(1.014,1.086)	0.006	1.035(1.003,1.069)	0.031	1.043(1.010,1.077)	0.011
female	0.976(0.907,1.051)	0.522	0.971(0.903,1.043)	0.418	0.955(0.869,1.051)	0.346	0.923(0.838,1.016)	0.101
Zinc, mg/d
age<60	1.012(0.967,1.058)	0.612	1.005(0.963,1.050)	0.811	0.983(0.886,1.091)	0.749	0.994(0.902,1.094)	0.895
age>60	0.965(0.905,1.028)	0.272	0.954(0.889,1.025)	0.202	0.944(0.870,1.024)	0.166	0.921(0.830,1.022)	0.123
male	1.014(0.975,1.054)	0.49	1.008(0.967,1.050)	0.712	1.002(0.914,1.097)	0.973	1.012(0.931,1.100)	0.781
female	0.944(0.893,0.998)	0.043	0.932(0.873,0.993)	0.031	0.867(0.792,0.950)	0.002	0.837(0.743,0.942)	0.003
Copper, mg/d
age<60	1.075(0.750,1.539)	0.694	1.050(0.639,1.726)	0.848	1.001(0.468,2.144)	0.998	1.056(0.526,2,118)	0.879
age>60	0.949(0.735,1.225)	0.688	0.854(0.536,1.359)	0.504	0.824(0.412,1.648)	0.584	0.645(0.258,1.615)	0.35
male	1.039(0.827,1.305)	0.744	0.991(0.756,1.298)	0.945	0.991(0.455,2.161)	0.983	1.011(0.522,1.958)	0.975
female	0.949(0.618,1.458)	0.813	0.870(0.483,1.568)	0.644	0.812(0.365,1.805)	0.609	0.679(0.225,2.051)	0.492
total dietary intakes
Vitamin C, mg/d
age<60	0.997(0.995,1.000)	0.055	0.997(0.994,1.000)	0.06	0.996(0.992,1.000)	0.032	0.996(0.992,0.999)	0.02
age>60	0.999(0.998,1.000)	0.077	0.999(0.998,1.000)	0.109	0.999(0.998,1.000)	0.094	0.999(0.997,1.001)	0.182
male	0.999(0.997,1.000)	0.105	0.999(0.997,1.000)	0.108	0.997(0.995,1.00)	0.021	0.997(0.995,0.999)	0.012
female	0.997(0.994,0.999)	0.016	0.997(0.994,0.999)	0.02	0.997(0.993,1.001)	0.102	0.997(0.994,1.000)	0.095
Vitamin K, μg/d
age<60	1.000(1.000,1.000)	0.628	1.000(1.000,1.000)	0.67	1.001(0.998,1.004)	0.661	1.001(0.998,1.004)	0.471
age>60	0.999(0.997,1.001)	0.494	0.998(0.996,1.001)	0.207	0.999(0.996,1.003)	0.643	0.997(0.992,1.002)	0.177
male	1.000(1.000,1.000)	0.964	1.000(0.999,1.001)	0.843	1.000(0.997,1.003)	0.884	1.000(0.997,1.003)	0.989
female	1.000(1.000,1.000)	0.864	1.000(1.000,1.000)	0.853	1.001(0.996,1.006)	0.593	1.001(0.997,1.004)	0.623
Iron, mg/d
age<60	1.009(0.998,1.020)	0.125	1.008(0.998,1.019)	0.125	1.011(0.985,1.037)	0.418	1.012(0.988,1.036)	0.338
age>60	0.990(0.962,1.019)	0.501	0.989(0.958,1.021)	0.501	0.989(0.957,1.023)	0.52	0.993(0.961,1.026)	0.676
male	1.008(0.998,1.019)	0.108	1.009(0.997,1.020)	0.142	1.018(0.988,1.049)	0.238	1.023(0.993,1.054)	0.138
female	0.993(0.970,1.016)	0.533	0.991(0.968,1.016)	0.482	0.992(0.969,1.016)	0.507	0.983(0.943,1.024)	0.41
Zinc, mg/d
age<60	0.989(0.948,1.031)	0.593	0.988(0.951,1.026)	0.527	0.974(0.915,1.037)	0.413	0.979(0.926,1.035)	0.458
age>60	0.986(0.949,1.024)	0.466	0.986(0.949,1.024)	0.462	0.967(0.917,1.021)	0.227	0.963(0.905,1.025)	0.234
male	0.996(0.958,1.036)	0.84	0.996(0.960,1.033)	0.821	0.983(0.933,1.036)	0.523	0.990(0.944,1.040)	0.7
female	0.970(0.940,1.001)	0.055	0.969(0.938,1.001)	0.055	0.939(0.886,0.0995)	0.032	0.924(0.866,0.985)	0.016
Copper, mg/d
age<60	0.941(0.592,1.495)	0.797	0.933(0.588,1.483)	0.771	0.875(0.468,1.636)	0.676	0.879(0.482,1.603)	0.674
age>60	1.107(1.000,1.226)	0.049	1.110(0.971,1.269)	0.125	1.501(0.915,2.462)	0.107	1.294(0.740,2.266)	0.366
male	1.058(0.894,1.253)	0.509	1.036(0.883,1.214)	0.667	1.079(0.619,1.881)	0.788	1.152(0.683,1.944)	0.596
female	1.044(0.774,1.408)	0.779	1.049(0.750,1.467)	0.782	1.154(0.665,2.002)	0.61	1.027(0.545,1.935)	0.934
Table S4. subgroup analysis of the Association between Dietary Intakes and PD
* Adjusted for age, gender, BMI, poverty income ratio, education, race, smoking, drinking, hypertension, diabetes, caffeine intake
